# Supplementary material for: Critical Role of the UBL Domain in Stimulating the E3 Ubiquitin Ligase Activity of UHRF1 toward Chromatin
Source: PubMed Central journal article supplement — Mol Cell. 2018 Nov 15;72(4):739–752.e9. doi: 10.1016/j.molcel.2018.09.028 (PMC6242706; doi:10.1016/j.molcel.2018.09.028), 2018-11-15

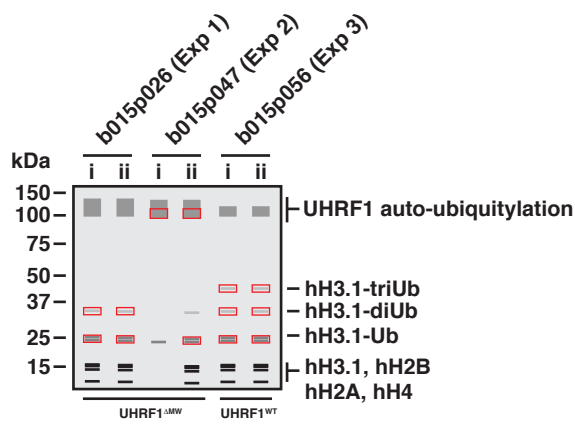

| Experiment       | Sample | Band (kDa) | Protein              | Modified site |
|------------------|--------|------------|----------------------|---------------|
| b015p026 (Exp 1) | Both   | 25, 35     | Histone H3           | 18            |
| b015p026 (Exp 1) | Both   | 25, 35     | Histone H3           | 23            |
| b015p026 (Exp 1) | Both   | 25, 35     | Histone H3           | 27            |
| b015p026 (Exp 1) | Both   | 25, 35     | Histone H3           | 9             |
| b015p026 (Exp 1) | Both   | 25, 35     | Histone H3           | 56            |
| b015p026 (Exp 1) | Both   | 35         | Ubiquitin            | 63            |
| b015p026 (Exp 1) | Both   | 35         | Ubiquitin            | 48            |
| b015p026 (Exp 1) | Both   | 25, 35     | Histone H3           | 79            |
| b015p047 (Exp 2) | ii     | 25         | Histone H3           | 23            |
| b015p047 (Exp 2) | ii     | 25         | Histone H3           | 56            |
| b015p047 (Exp 2) | Both   | 100        | UHRF1 <sup>ΔMW</sup> | 11            |
| b015p047 (Exp 2) | ii     | 100        | UHRF1 <sup>ΔMW</sup> | 31            |
| b015p047 (Exp 2) | ii     | 100        | UHRF1 <sup>ΔMW</sup> | 50            |
| b015p047 (Exp 2) | ii     | 100        | UHRF1 <sup>ΔMW</sup> | 84            |
| b015p047 (Exp 2) | ii     | 100        | UHRF1 <sup>ΔMW</sup> | 381           |
| b015p047 (Exp 2) | Both   | 100        | UHRF1 <sup>ΔMW</sup> | 383           |
| b015p047 (Exp 2) | ii     | 100        | UHRF1 <sup>ΔMW</sup> | 404           |
| b015p047 (Exp 2) | ii     | 100        | UHRF1 <sup>ΔMW</sup> | 524           |
| b015p047 (Exp 2) | ii     | 100        | UHRF1 <sup>ΔMW</sup> | 550           |
| b015p047 (Exp 2) | Both   | 100        | UHRF1 <sup>ΔMW</sup> | 641           |
| b015p047 (Exp 2) | Both   | 100        | UHRF1 <sup>ΔMW</sup> | 648           |
| b015p047 (Exp 2) | ii     | 100        | UHRF1 <sup>ΔMW</sup> | 662           |
| b015p047 (Exp 2) | ii     | 100        | UHRF1 <sup>ΔMW</sup> | 664           |
| b015p047 (Exp 2) | ii     | 100        | Ubiquitin            | 63            |
| b015p056 (Exp 3) | Both   | 35, 44     | Histone H3           | 14            |
| b015p056 (Exp 3) | Both   | 25, 35, 44 | Histone H3           | 23            |
| b015p056 (Exp 3) | Both   | 35, 44     | Histone H3           | 18 and 23     |
| b015p056 (Exp 3) | Both   | 25, 35, 44 | Histone H3           | 27            |

Experiment 1 (UHRF1<sup>AMW</sup> H3-ubiquitylation, b015p026)

H3K18-Ub

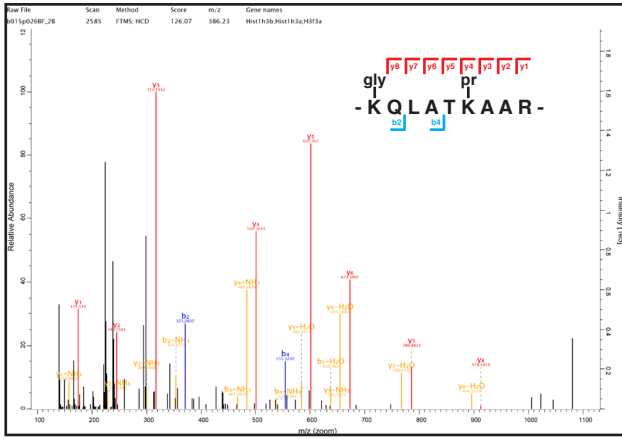

H3K23-Ub

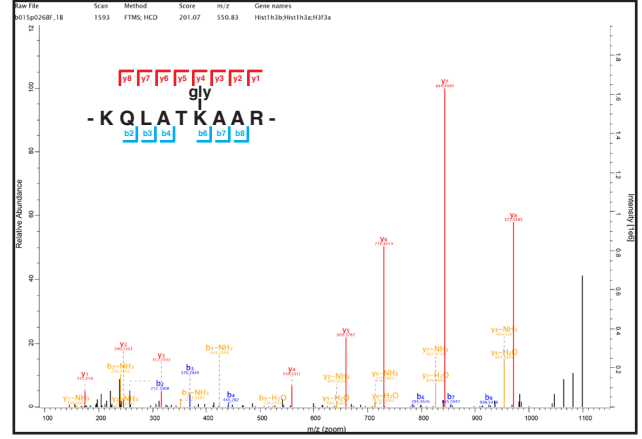

H3K56-Ub

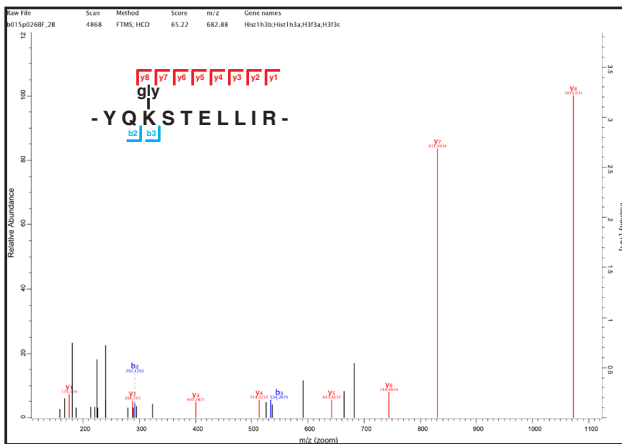

H3K9-Ub

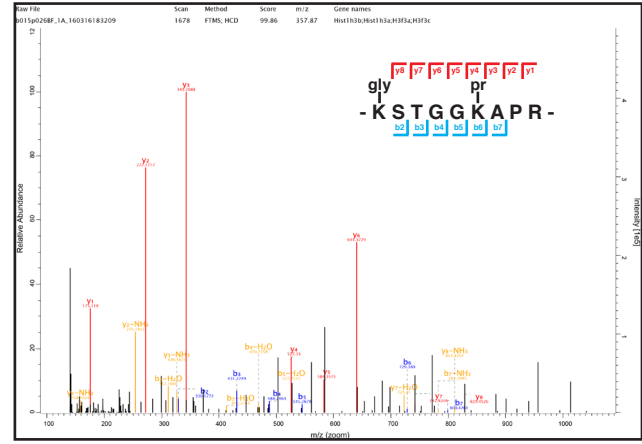

H3K27-Ub

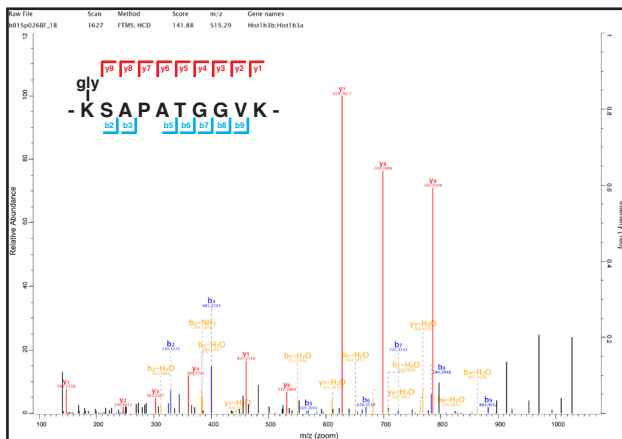

Experiment 2 (UHRF1<sup>ΔMW</sup> auto-ubiquitylation and H3-ubiquitylation, b015p047)

H3K23-Ub

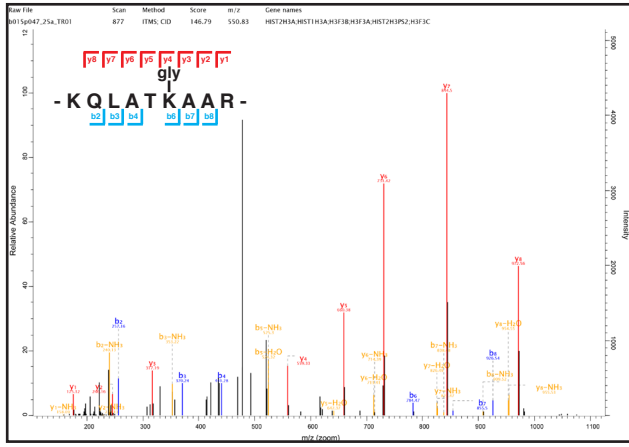

H3K56-Ub

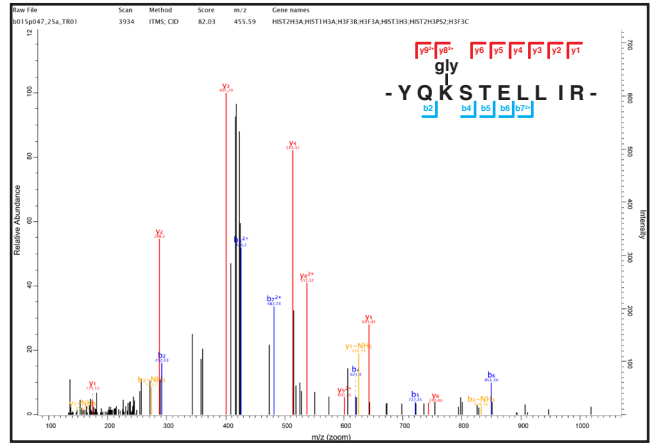

UHRF1<sup>ΔMW</sup> K11 auto-Ub

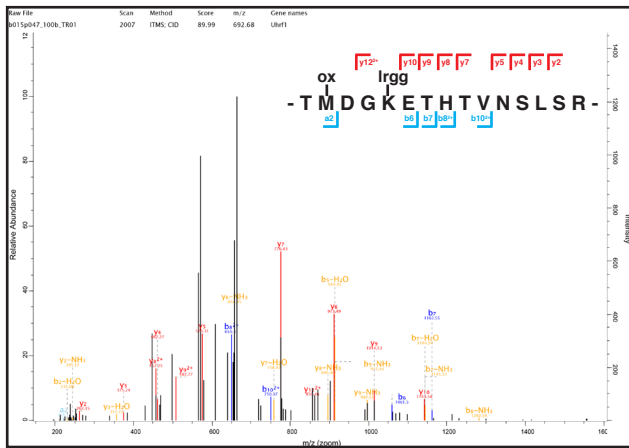

UHRF1<sup>ΔMW</sup> K31 auto-Ub

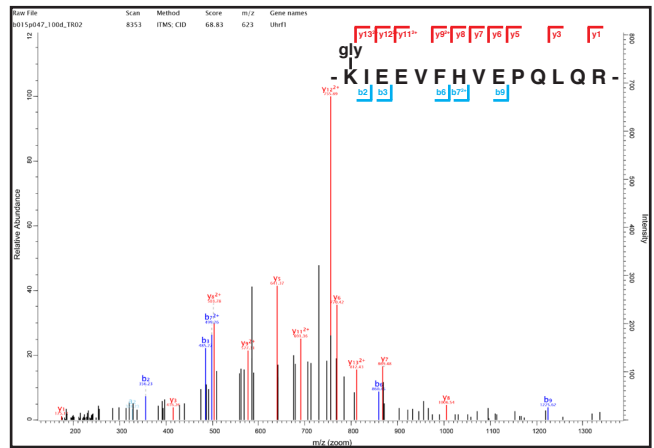

UHRF1<sup>ΔMW</sup> K50 auto-Ub

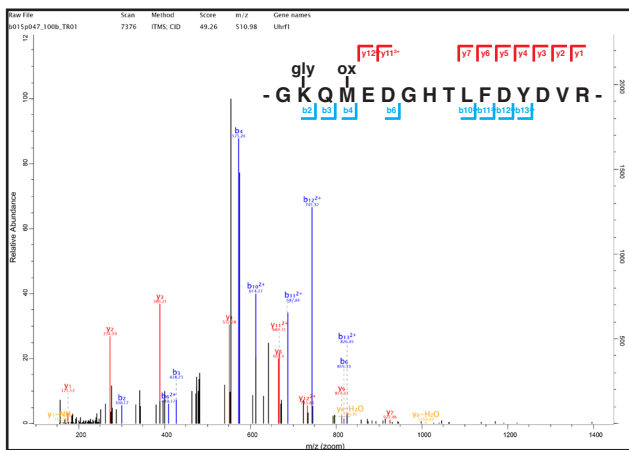

UHRF1<sup>ΔMW</sup> K381 auto-Ub

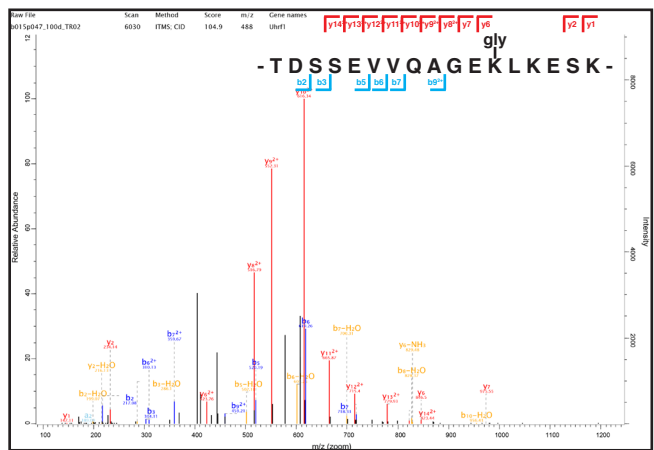

Experiment 2 (UHRF1<sup>ΔMW</sup> auto-ubiquitylation and H3-ubiquitylation, b015p047)

UHRF1<sup>ΔMW</sup> K383 auto-Ub

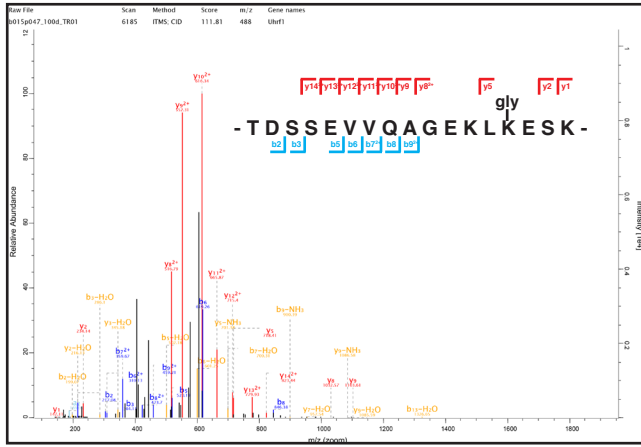

UHRF1<sup>ΔMW</sup> K404 auto-Ub

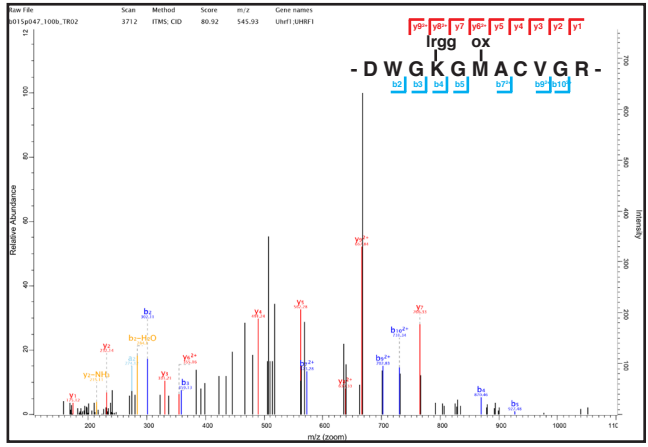

UHRF1<sup>ΔMW</sup> K641 auto-Ub

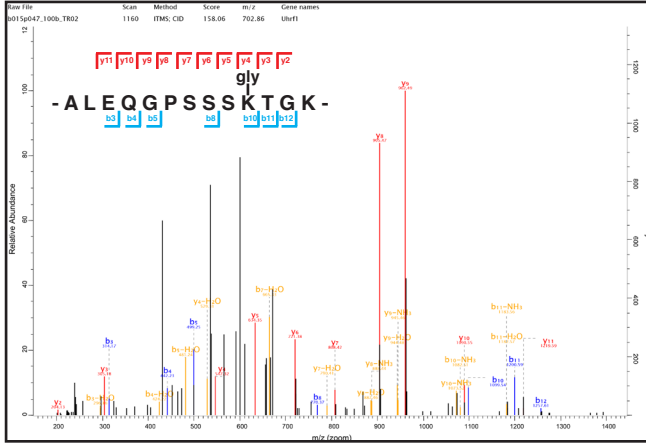

UHRF1<sup>ΔMW</sup> K664 auto-Ub

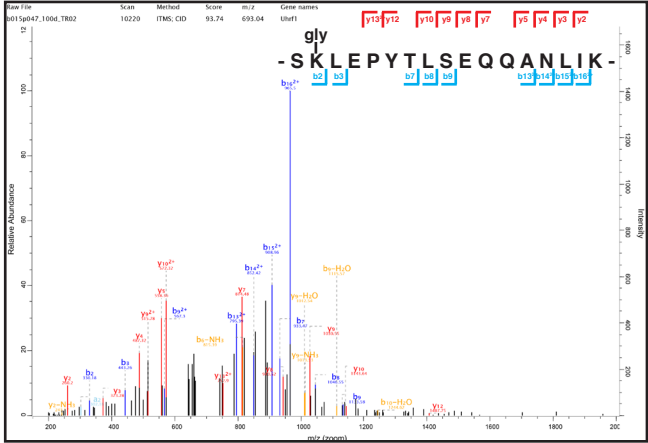

Experiment 3 (UHRF1<sup>WT</sup> H3-ubiquitylation, b015p056)

H3K18-Ub/K23-Ub

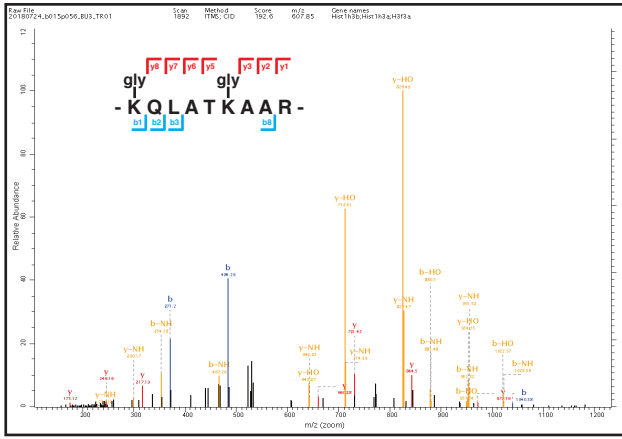

H3K23-Ub

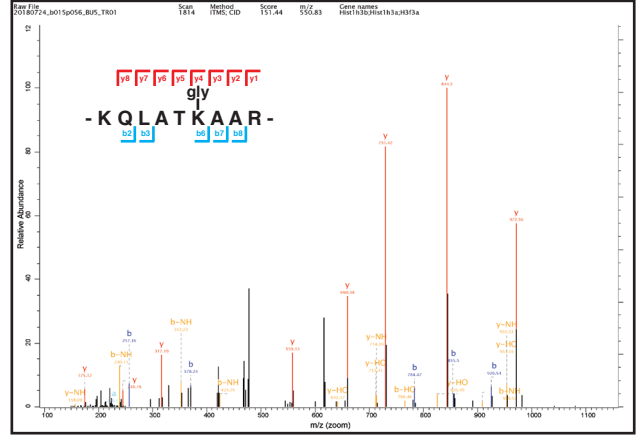

H3K14-Ub

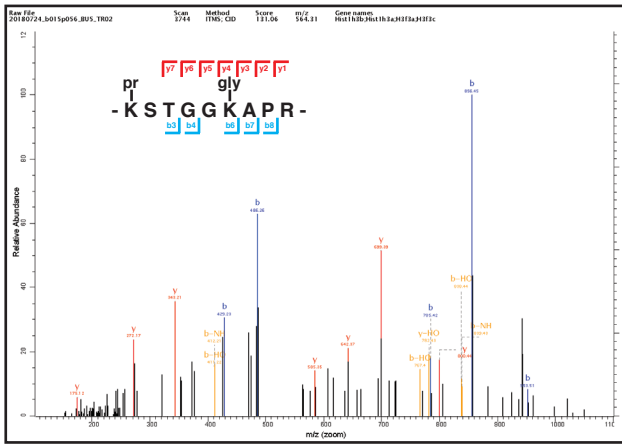

H3K23-Ub

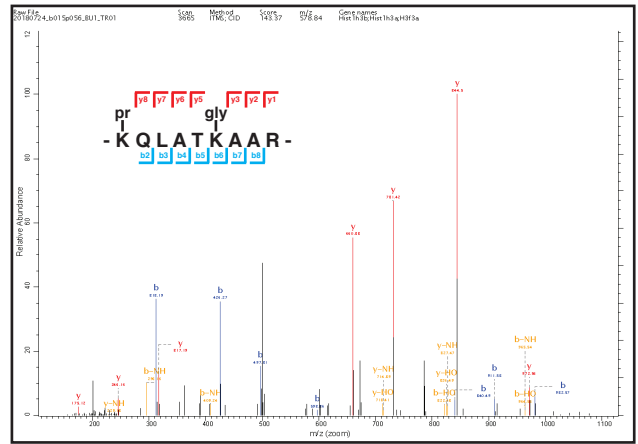

H3K27-Ub

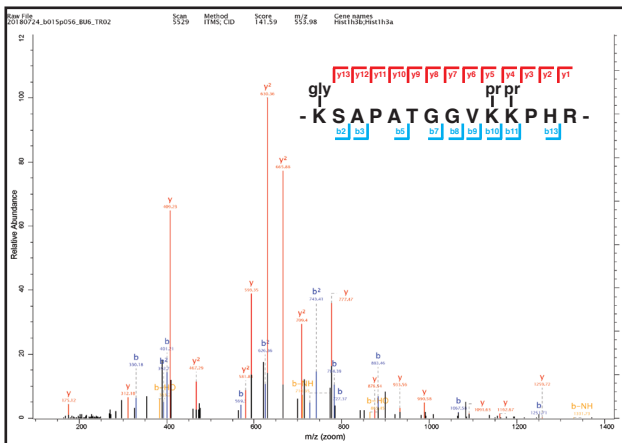

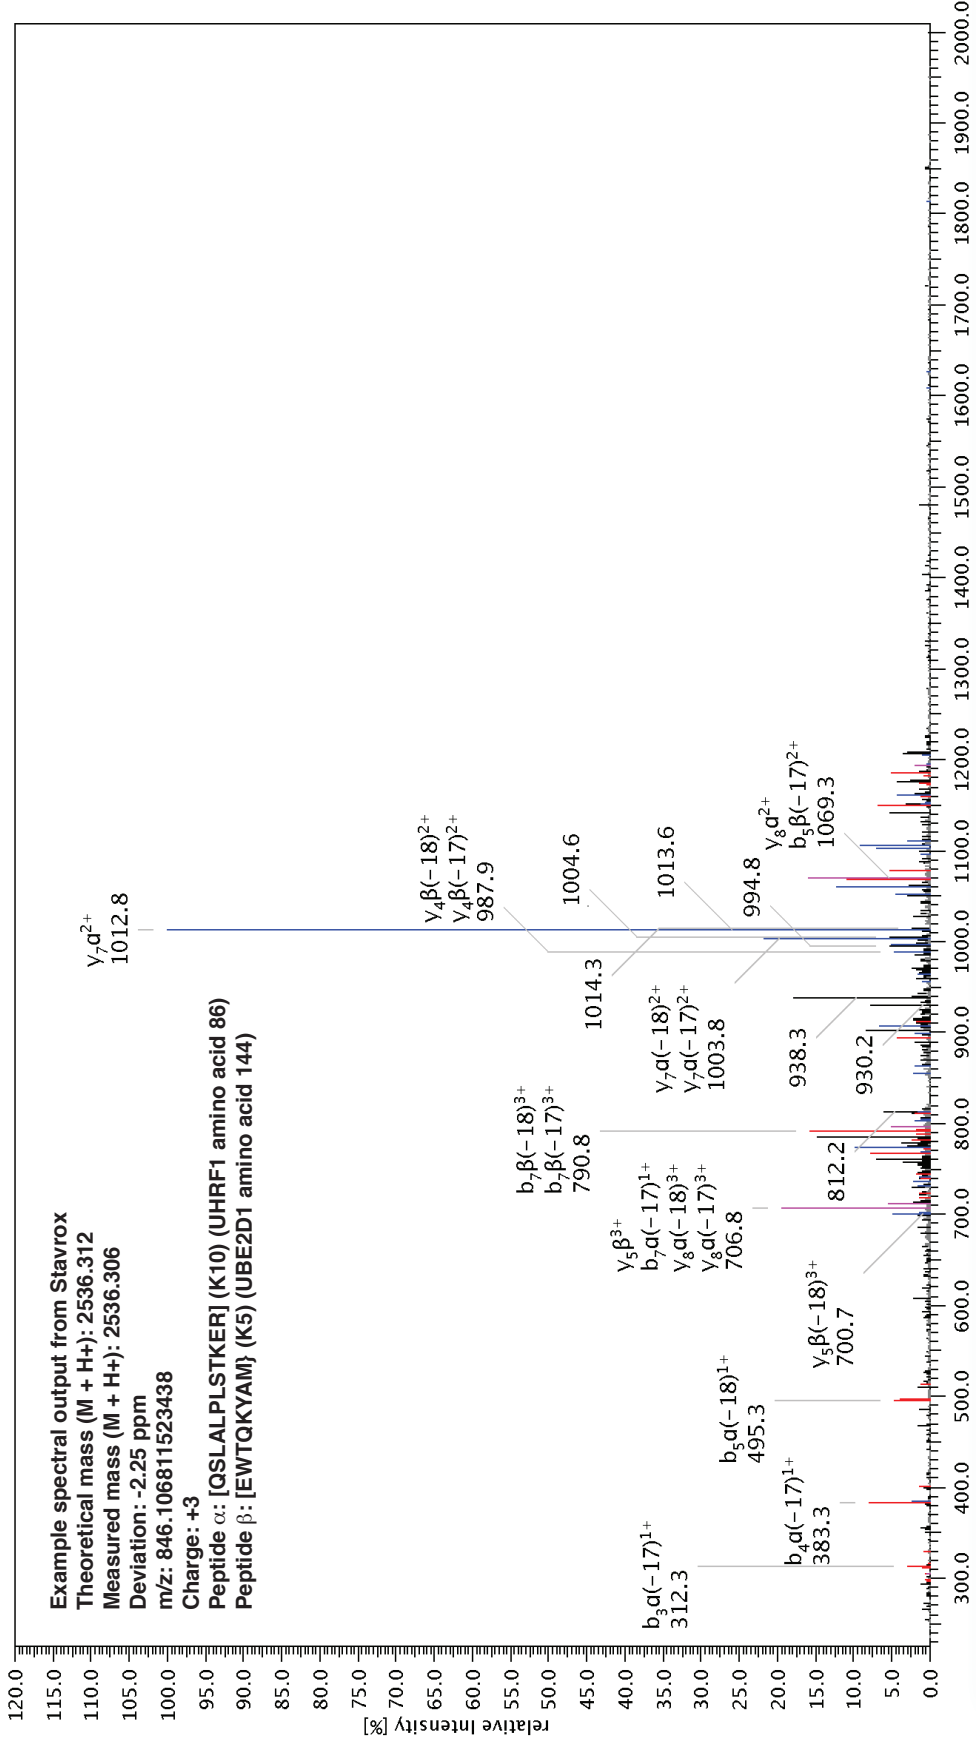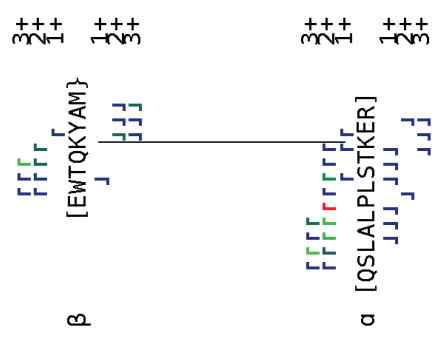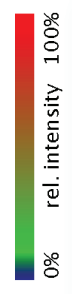

Supplement: mmc4.pdf [file mmc4.pdf]
